# Supplementary material for: Monitoring the carburization of molybdenum bimetallic nitrides and oxynitrides with CH4/H2/Ar mixtures: identification of a new carbonitride
Source: Royal Society of Chemistry journal article supplement (doi:10.1039/b803448f), 2008-11-06
Supplement: b803448f.pdf [file b803448f.pdf]

## Electronic Supplementary Information

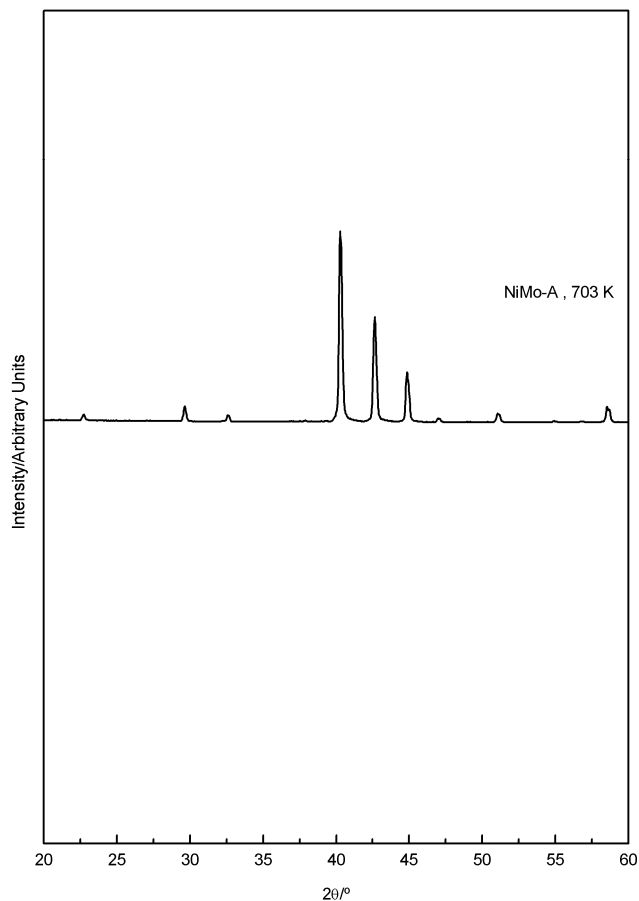

**Fig. S1** XRD pattern of NiMo-A (703 K, CH<sub>4</sub>/H<sub>2</sub>/Ar 16/4/80 vol%).

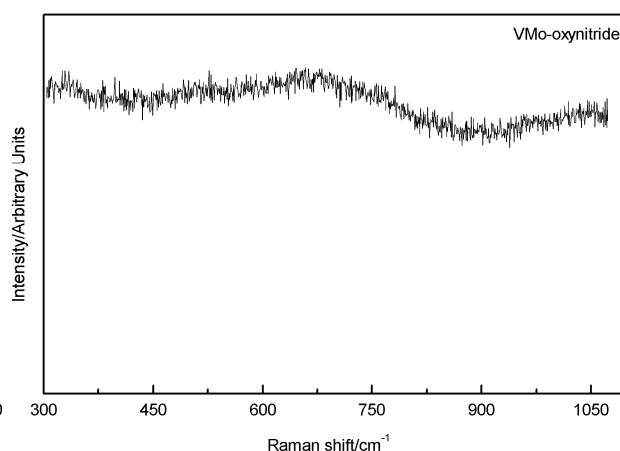

**Fig. S2** LRS spectrum of VMo-oxynitride.

5

## Results corresponding to NiMo samples obtained with CH<sub>4</sub>/H<sub>2</sub>/Ar 4/16/80 vol%

**Table S1** Experimental preparation conditions and chemical compositions of Ni<sub>2</sub>Mo<sub>3</sub>N compound before and after reacting with a CH<sub>4</sub>/H<sub>2</sub>/Ar 4/16/80 vol% gas mixture

| Sample <sup>a</sup> | T <sub>f</sub> /K <sup>b</sup> | Analysis (%)      |                |                | Stoichiometry proposed <sup>f</sup> |                                                                   |
|---------------------|--------------------------------|-------------------|----------------|----------------|-------------------------------------|-------------------------------------------------------------------|
|                     |                                | M/Mo <sup>c</sup> | C <sup>d</sup> | N <sup>d</sup> |                                     | O <sup>e</sup>                                                    |
| NiMo-A              | 703                            | -                 | 0.17           | 3.33           | -                                   |                                                                   |
| NiMo-B              | 923                            | 0.77              | 1.44           | 1.84           | 0.13                                | Ni <sub>2</sub> Mo <sub>3</sub> C <sub>0.5</sub> N <sub>0.5</sub> |

<sup>a</sup> A-B point temperature in Figure 1. <sup>b</sup> Final temperature, t = 0 h. With NH<sub>3</sub>, t = 2-4 h. <sup>c</sup> EDAX (at%). <sup>d</sup> Combustion analysis (wt%). <sup>e</sup> From TGA. <sup>f</sup> Stoichiometry of the bulk samples assuming the nominal M/Mo ratio. H content was < 0.1% in all samples.

**Table S2** Crystal parameters and selected bond distances for sample NiMo-B prepared with a CH<sub>4</sub>/H<sub>2</sub>/Ar 4/16/80 vol% gas mixture

| Atom/Wyckoff site                                                                                                               | x           | y           | z           |
|---------------------------------------------------------------------------------------------------------------------------------|-------------|-------------|-------------|
| Ni <sub>2</sub> Mo <sub>3</sub> (C <sub>x</sub> N <sub>y</sub> ), space group P4 <sub>1</sub> 32, a = 6.65142(3) Å              |             |             |             |
| Ni (8c)                                                                                                                         | 0.18211(18) | 0.18211(18) | 0.18211(18) |
| Mo (12d)                                                                                                                        | 0.79861(10) | 0.04861(10) | 1/8         |
| C, N (4b)                                                                                                                       | 7/8         | 7/8         | 7/8         |
| χ <sup>2</sup> = 1.37, R <sub>p</sub> = 13.0, R <sub>wp</sub> = 13.0, R <sub>B</sub> = 2.41, R <sub>F</sub> = 2.91 <sup>a</sup> |             |             |             |
| Ni-Ni = 2.471(2) Å; Ni-Mo = 2.7275(10), 2.7577(16), 2.8251(10) Å, Mo-Mo = 2.7814(8), 2.8286(10) Å; Mo-C,N = 2.0873(5) Å         |             |             |             |

<sup>a</sup>  $R_p = \frac{\sum |y_i(\text{obs}) - y_i(\text{calc})|}{\sum y_i(\text{obs})}$ ,  $R_{wp} = \frac{\{\sum w_i(y_i(\text{obs}) - y_i(\text{calc}))^2\}^{1/2}}{\sum w_i(y_i(\text{obs}))^2}^{1/2}$ ,  $R_B = \frac{\sum |I_k(\text{'obs'}) - I_k(\text{calc})|}{\sum I_k(\text{'obs'})}$ ,  $R_F = \frac{\sum |I_k(\text{'obs'})^{1/2} - I_k(\text{calc})^{1/2}|}{\sum I_k(\text{'obs'})^{1/2}}$ .

10

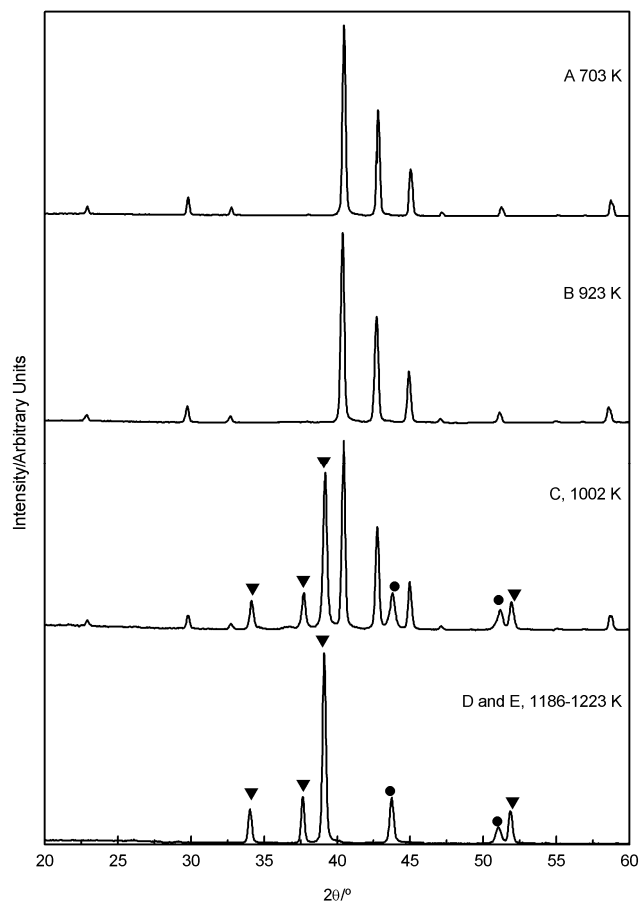

**Fig. S3** X-ray diffraction patterns of the products obtained during the temperature-programmed reaction in CH<sub>4</sub>/H<sub>2</sub>/Ar (4/16/80 vol %) stopped at different temperatures (Samples A-E) of Ni<sub>2</sub>Mo<sub>3</sub>N. Marked reflections correspond to: ● Ni-Mo-C solid solution, ▼ β-Mo<sub>2</sub>C (JCPDS card N° 35-0787).

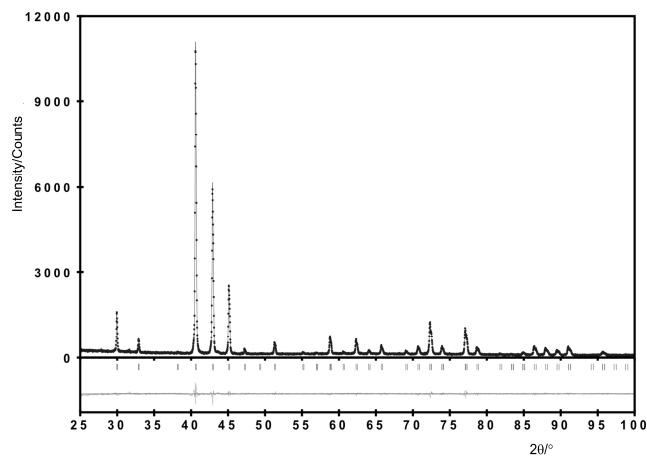

**Fig. S4** Observed (dotted) and calculated (solid) X-ray diffraction profiles for sample NiMo-B prepared with a CH<sub>4</sub>/H<sub>2</sub>/Ar 4/16/80 vol% gas mixture. Tic marks below the diffractograms represent the allowed Bragg reflections. The residual lines are located at the bottom of the figure.
